# Supplementary material for: The Role of Inflammatory Biomarkers in Mediating the Effect of Inflammatory Bowel Disease on nonmalignant Digestive System Diseases: A Multivariable Mendelian Randomized Study
Source: Can J Gastroenterol Hepatol. 2024 Mar 18;2024:1266139. doi: 10.1155/2024/1266139 (PMC10963109; doi:10.1155/2024/1266139)
Supplement: Supplementary Materials — Additional file 1: Table S1. The differences between the various methods. Table S2. The F-statistic in instrumental variable strength analysis. Table S3. Summary information on the SNPs used as genetic instruments for the CD in MR study in acute pancreatitis. Table S4. Summary information on the SNPs used as genetic instruments for the CD in MR study in irritable bowel syndrome. Table S5. Summary information on the SNPs used as genetic instruments for the CD in MR study in gastroesophageal reflux disease. Table S6. Summary information on the SNPs used as genetic instruments for the CD in MR study in cholelithiasis. Table S7. Summary information on the SNPs used as genetic instruments for the CD in MR study in celiac disease. Table S8. Summary information on the SNPs used as genetic instruments for the UC in MR study in acute pancreatitis. Table S9. Summary information on the SNPs used as genetic instruments for the UC in MR study in irritable bowel syndrome. Table S10. Summary information on the SNPs used as genetic instruments for the UC in MR study in gastroesophageal reflux disease. Table S11. Summary information on the SNPs used as genetic instruments for the UC in MR study in Cholelithiasis. Table S12. Summary information on the SNPs used as genetic instruments for the UC in MR study in Interleukin-6. Table S13. Summary information on the SNPs used as genetic instruments for the UC in MR study in c-reactive protein. Table S14. Summary information on the SNPs used as genetic instruments for the UC in MR study in Tumor necrosis factor-α. Table S15. Summary information on the SNPs used as genetic instruments for the UC in MR study in celiac disease. Additional file 2: Figure S1 Leave-one-out analysis and forest plots for causal effect of Crohn's disease on outcome. Figure S2. Leave-one-out analysis and forest plots for causal effect of ulcerative colitis on outcome. Figure S3. Leave-one-out analysis and forest plots for causal effect of ulcerative colitis on inter [file 1266139.f1.zip]

Archive with 2 entries (2 files):
- Additional files1 (1).docx
- Additional files2 (1).docx
